# Supplementary material for: Three-Dimensional-Printed Polymeric Cores for Methane Hydrate Enhanced Growth
Source: Polymers (Basel). 2023 May 15;15(10):2312. doi: 10.3390/polym15102312 (PMC10221765; doi:10.3390/polym15102312)
Supplement: Supplementary file 1 [file polymers-15-02312-s001.zip]

Archive with 10 entries (10 files):
- polymers-2351414-supplementary.pdf
- Video S1_3 ml_PLA.avi
- Video S2_2 ml_PLA.avi
- Video S3_2 ml_ABS.avi
- Video S4_2 ml_ABS (repeat just after hydrate dissociation).avi
- Video S5_2 ml_UltraX.avi
- Video S6_2 ml_ePC.avi
- Video S7_5 ml_PLA.avi
- Video S8_5 ml_ePC.avi
- Video S9_5 ml_ePC (repeat just after hydrate dissociation).avi
